# Supplementary material for: High voltage cathode materials for Na-ion batteries of general formula Na3V2O2x(PO4)2F3−2x
Source: Royal Society of Chemistry journal article supplement (doi:10.1039/c2jm35293a), 2012-01-01
Supplement: c2jm35293a.pdf [file c2jm35293a.pdf]

## SUPPLEMENTARY INFORMATION

S1. Comparison of cell volume values for the synthesized samples with the  $V^{4+}$  and  $V^{3+}$  extremes

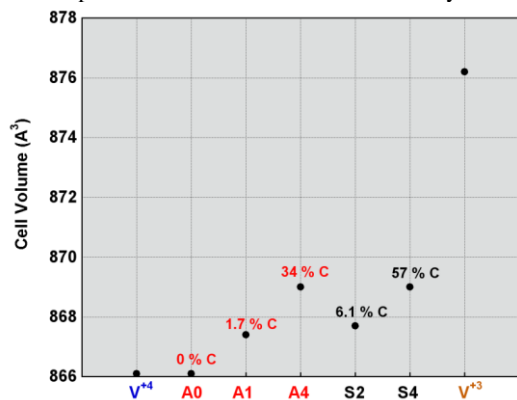

S2. EPR spectra of (a) S2 and S4 samples and (b) augmented view for S2 and S4.

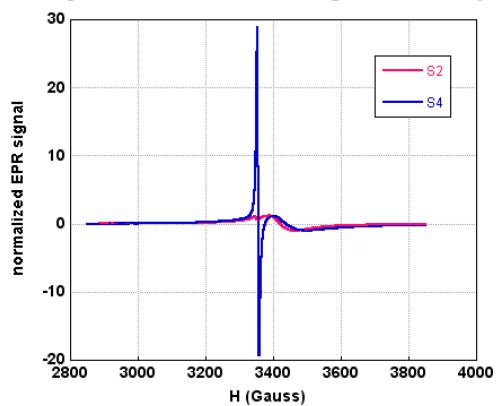

a)

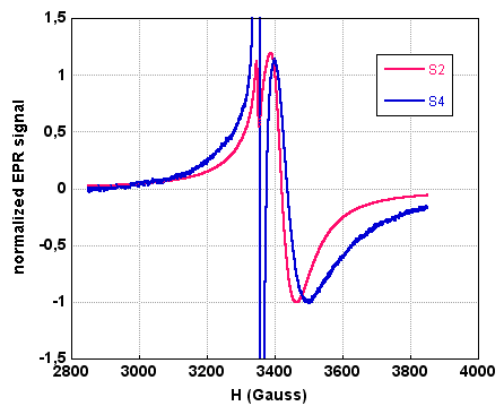

b)
